# Supplementary material for: Associations of potentially functional variants in IL-6, JAKs and STAT3 with gastric cancer risk in an eastern Chinese population
Source: PubMed Central journal article supplement (PMC5053713; doi:10.18632/oncotarget.8492), 2016-03-30
Supplement: oncotarget-07-28112-s001.pdf [file oncotarget-07-28112-s001.pdf]

## SUPPLEMENTARY FIGURES AND TABLE

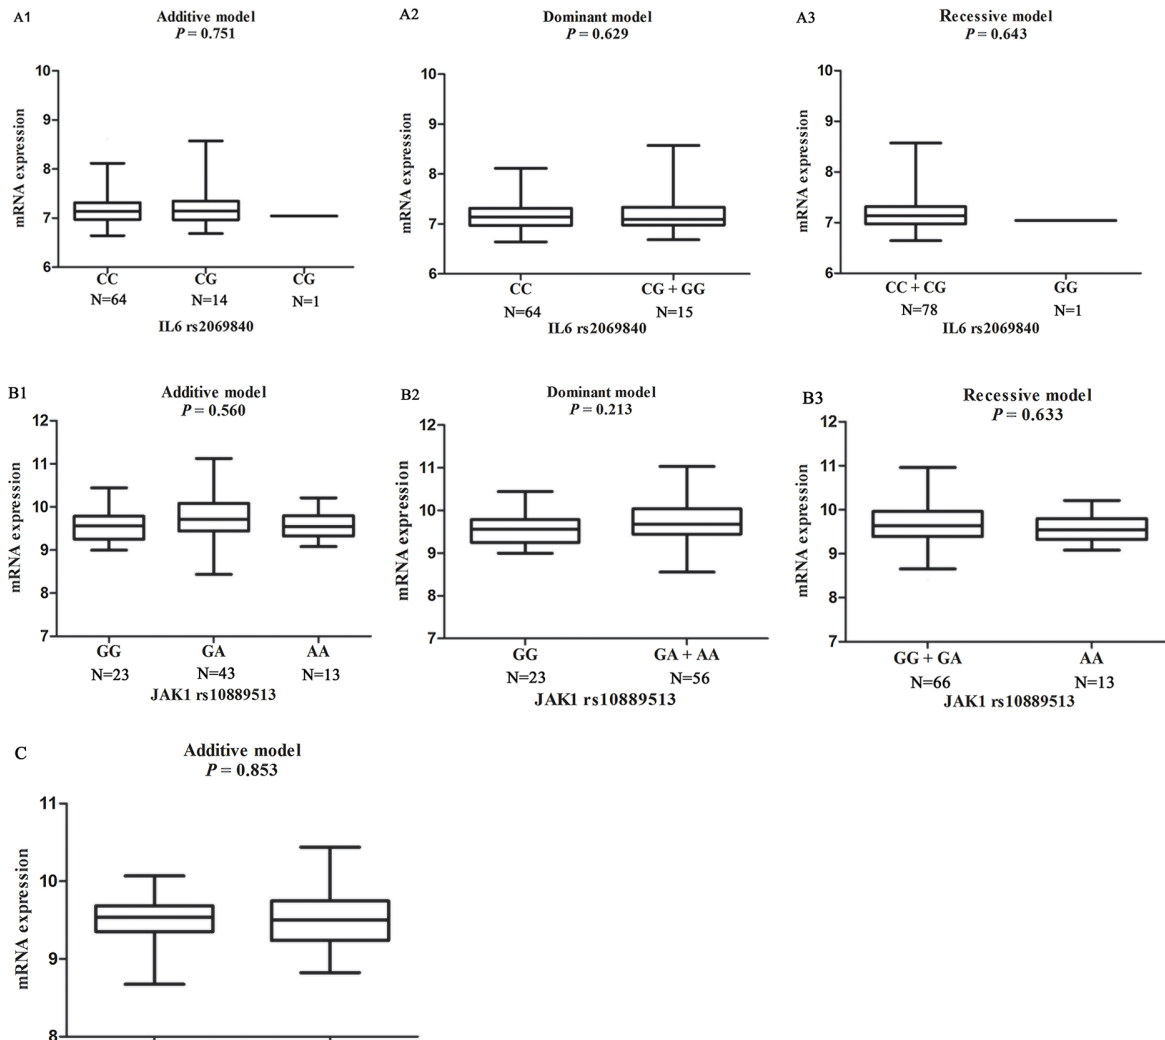

Supplementary Figure S1: eQTL analysis of mRNA expression for genotype-phenotype correlation analysis in three different genetic models (additive, dominant and recessive) from EBV-transformed B lymphoblastoid cell lines of 79 unrelated Chinese people included in HapMap 3 database. A1–A3, for *IL-6* rs2069840. B1–B3, for *JAK1* rs10889513. C, for *JAK1* rs1887429. (Continued).

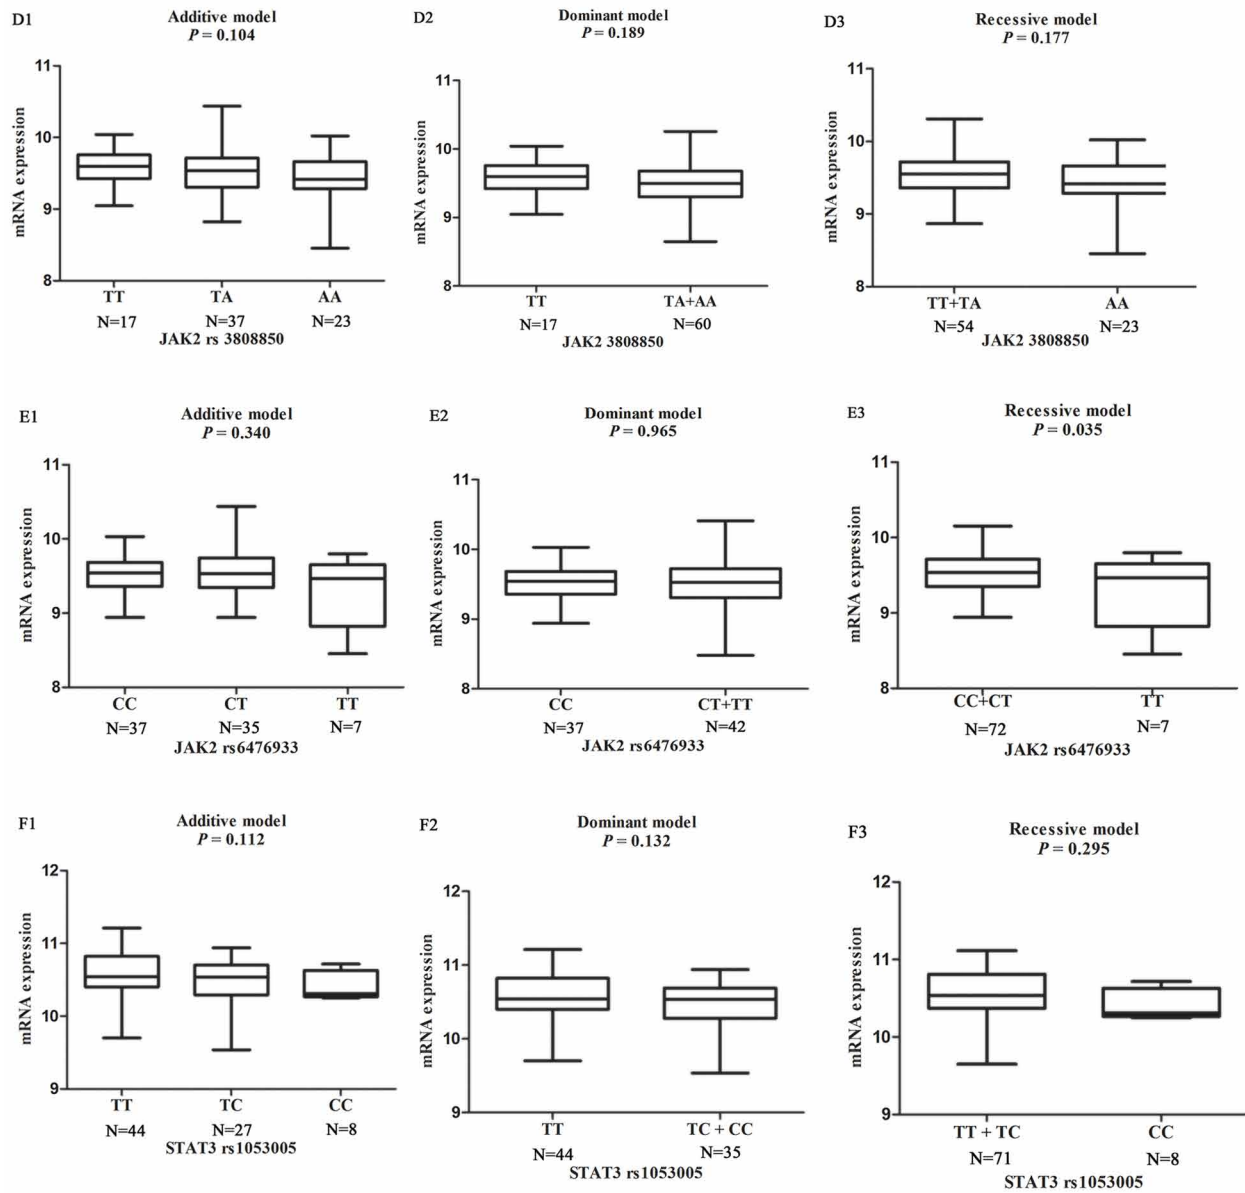

**Supplementary Figure S1: (Continued)** eQTL analysis of mRNA expression for genotype-phenotype correlation analysis in three different genetic models (additive, dominant and recessive) from EBV-transformed B lymphoblastoid cell lines of 79 unrelated Chinese people included in HapMap 3 database. D1–D3, for *JAK2* rs3808850. E1–E3, for *JAK2* rs6476933. F1–F3, for *STAT3* rs1053005. (Continued).

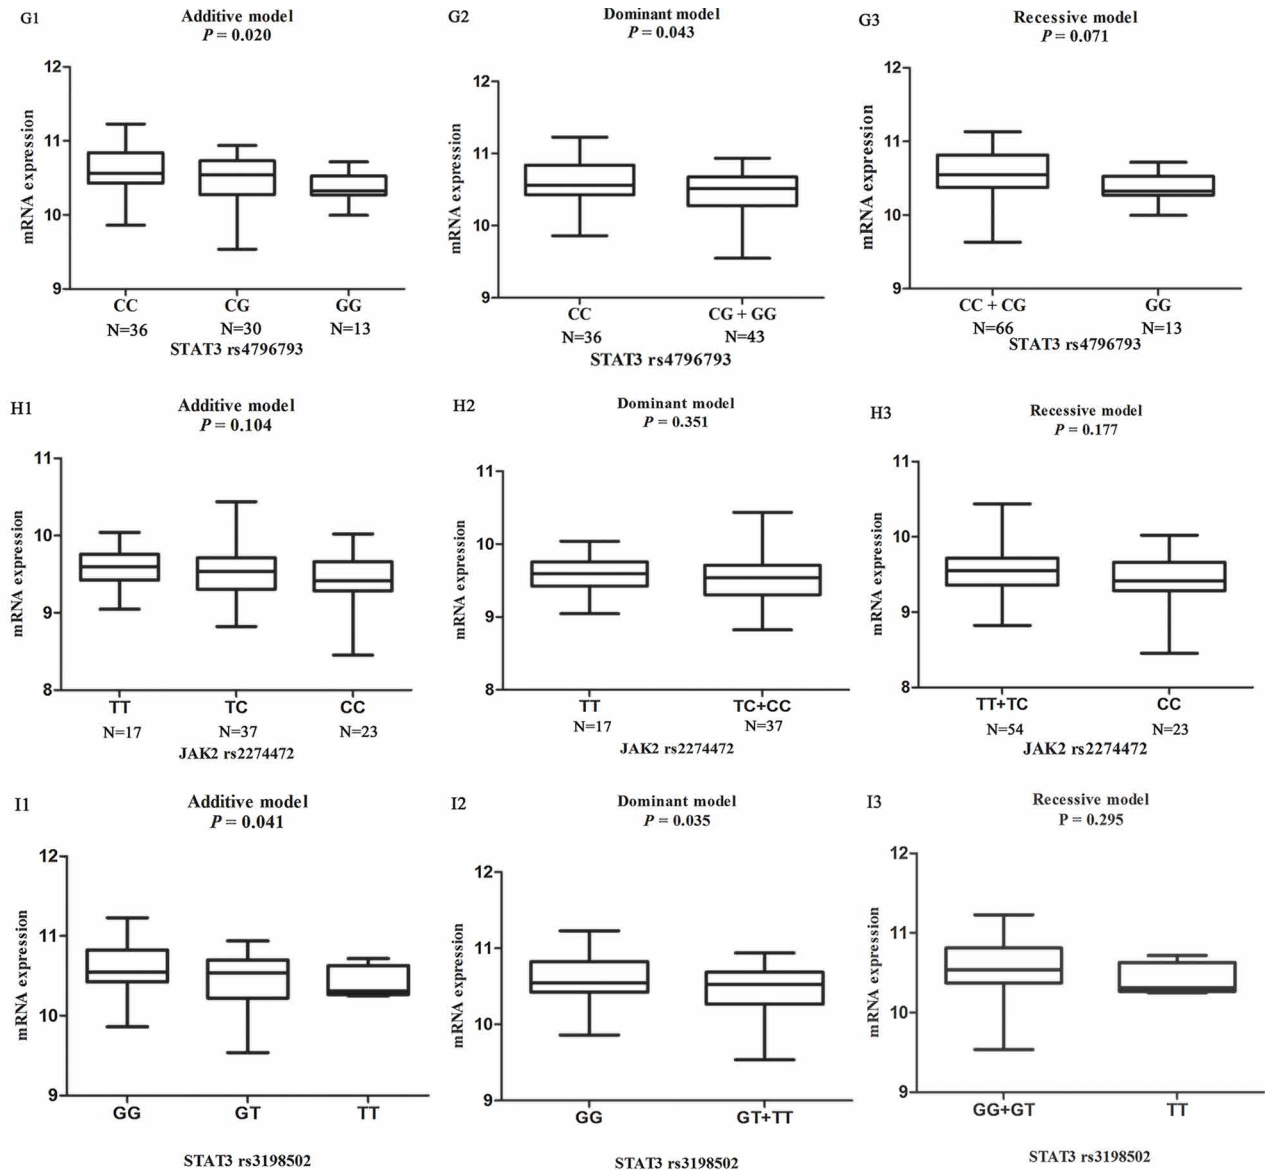

**Supplementary Figure S1: (Continued)** eQTL analysis of mRNA expression for genotype-phenotype correlation analysis in three different genetic models (additive, dominant and recessive) from EBV-transformed B lymphoblastoid cell lines of 79 unrelated Chinese people included in HapMap 3 database. G1–G3, for *STAT3* rs4796793. H1–H3, for *STAT3* rs2274472. I1–I3, for *STAT3* rs3198502. (Continued).

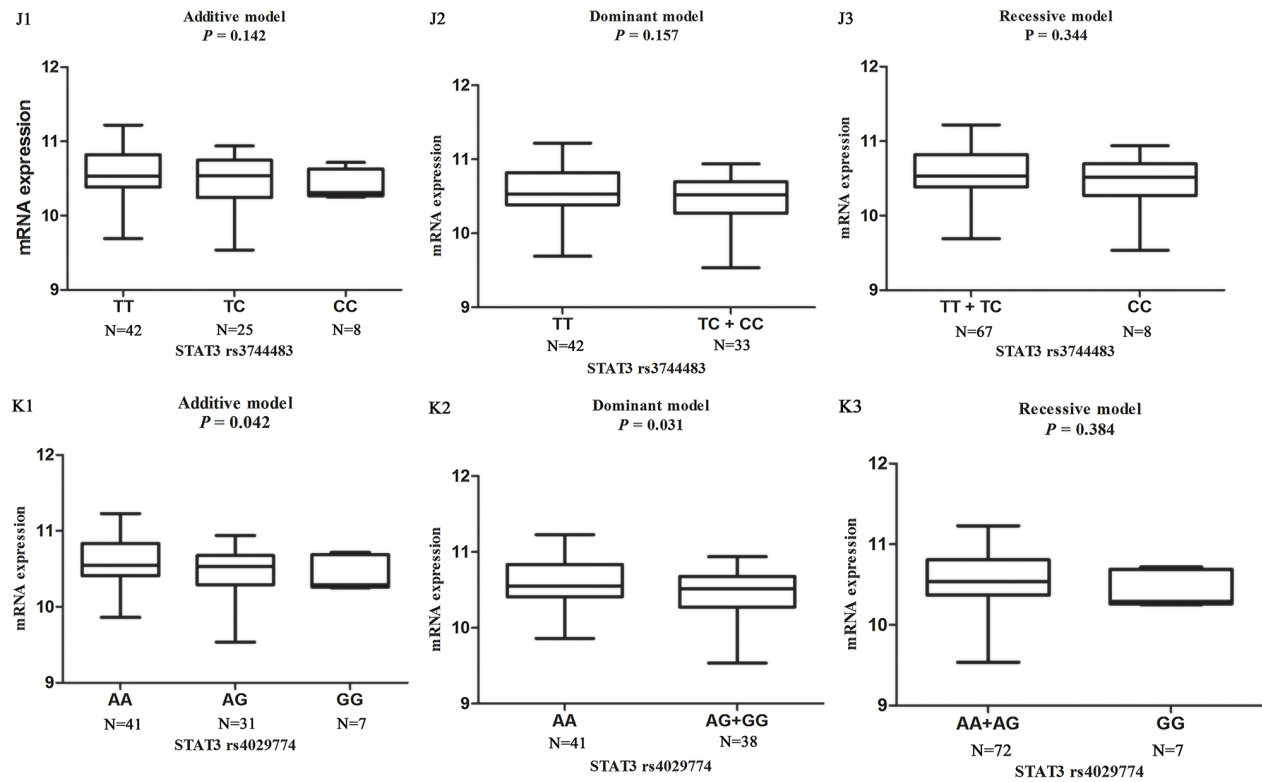

**Supplementary Figure S1: (Continued)** eQTL analysis of mRNA expression for genotype-phenotype correlation analysis in three different genetic models (additive, dominant and recessive) from EBV-transformed B lymphoblastoid cell lines of 79 unrelated Chinese people included in HapMap 3 database. J1–J3. for *STAT3* rs3744483. K1–K3. for *STAT3* rs4029774.

**Supplementary Table S1: The ten selected and genotyped SNPs and those SNPs they tagged based on the online prediction tool SNPinfo and Hapmap 3 as validated in Chinese populations**

| Gene         | SNPs selected and genotyped | SNPs in LD ( $r^2 \geq 0.8$ ) or tagged but not genotyped                                                                                                                                                                                                                                 |
|--------------|-----------------------------|-------------------------------------------------------------------------------------------------------------------------------------------------------------------------------------------------------------------------------------------------------------------------------------------|
| <i>IL-6</i>  | rs2069837                   | rs11981074, rs1800796*                                                                                                                                                                                                                                                                    |
|              | rs2096840                   | rs12956846, rs12956909, rs206590                                                                                                                                                                                                                                                          |
| <i>JAK1</i>  | rs10889513                  | rs12409333, rs12730021, rs1497056, rs4587600, rs4915675, rs7546535, rs7546545, rs7553101                                                                                                                                                                                                  |
|              | rs2230587                   | rs10493364, rs10889499, rs12406400, rs17097146*, rs17127090, rs17127107, rs17127117, rs1887050, rs2230587, rs2478151, rs3762311, rs3790541, rs4916008, rs6679426, rs914960;                                                                                                               |
| <i>JAK2</i>  | rs1887429                   | None                                                                                                                                                                                                                                                                                      |
|              | rs3808850                   | rs2274472*                                                                                                                                                                                                                                                                                |
|              | rs6476933                   | None                                                                                                                                                                                                                                                                                      |
| <i>STAT3</i> | rs1053004                   | rs12601982, rs9895297                                                                                                                                                                                                                                                                     |
|              | rs1053005                   | rs1053023*, rs12601982, rs16967611, rs16967620, rs2272087, rs2293154, rs2293155, rs3198502*, rs34129849, rs3744483*, rs3809758, rs4029774*, rs6503692, rs7209222, rs7218653, rs8064638, rs8074524, rs8078731, rs8080122, rs8082188, rs8082391, rs9906933, rs9906989, rs9907247, rs9909659 |
|              | rs4796793                   | rs1026916, rs11079043, rs12942547, rs12949918, rs17885629, rs3785898, rs3816769, rs4103200, rs4796791, rs6503695, rs6503696, rs6503697, rs7211777, rs7217655, rs7219739, rs744166, rs8069645, rs957970, rs963988, rs9891119, rs9912773                                                    |

\*Also potentially functional as predicted by SNPinfo.
